# Supplementary material for: Key Transitions in the Evolution of Rapid and Slow Growing Mycobacteria Identified by Comparative Genomics
Source: Front Microbiol. 2020 Jan 21;10:3019. doi: 10.3389/fmicb.2019.03019 (PMC6985099; doi:10.3389/fmicb.2019.03019)
Supplement: Supplementary file 3 [file Table_2.XLSX]

## Sheet: Sheet1
Table S2: List of genes in Mycobacterium tuberculosis H37Rv regions of differences (RODs)
GI-LeuT	Common in slow growing species
Locus Tag	Product
Rv0021	oxidoreductase
Rv0022	transcriptional regulator WhiB5
Rv0023	transcriptional regulator
Rv0024	NLP/P60 family protein
Rv0025	hypothetical protein
Rv0026	hypothetical protein
Rv0027	hypothetical protein
Rv0028	hypothetical protein
Rv0029	hypothetical protein
Rv0030	hypothetical protein
Rv0032	8-amino-7-oxononanoate synthase
Rv0033	acyl carrier protein AcpA
Rv0034	hypothetical protein
Rv0035	fatty-acid--CoA ligase FadD34
ROD-1	Common in slow growing species
Locus Tag	Product
Rv0059	hypothetical protein
Rv0060	hypothetical protein
Rv0061	hypothetical protein
ROD-2	Common in slow growing species
Locus Tag	Product
Rv0354	PPE family protein PPE7
Rv0355	PPE family protein PPE8
ROD-3	Sporadic appearance in rapid and slow growing species
Locus Tag	Product
Rv0789	hypothetical protein
Rv0790	hypothetical protein
Rv0791	hypothetical protein
Rv0792	transcriptional regulator
Rv0793	monooxygenase
Rv0794	oxidoreductase
Rv0797	insertion sequence element IS1547 transposase
ROD-4	Present in M. tuberculosis complex
Locus Tag	Product
Rv0986	adhesion component ABC transporter ATP-binding protein
Rv0987	adhesion component ABC transporter permease
Rv0988	hypothetical protein
Rv0989	polyprenyl-diphosphate synthase GrcC
GI-LeuX	Present in M. tuberculosis complex
Locus Tag	Product
Rv1037	ESAT-6 like protein EsxI
Rv1038	ESAT-6 like protein EsxJ
Rv1039	PPE family protein PPE15
Rv1040	PE family protein PE8
Rv1041	IS2-like transposase
Rv1042	IS2-like transposase
Rv1043	hypothetical protein
Rv1044	hypothetical protein
Rv1045	hypothetical protein
Rv1047	transposase
Rv1048	hypothetical protein
Rv1049	transcriptional repressor
Rv1050	oxidoreductase
Rv1051	hypothetical protein
Rv1052	hypothetical protein
ROD-5	Common in slow growing species
Locus Tag	Product
Rv1357	hypothetical protein
Rv1358	transcriptional regulator
Rv1359	transcriptional regulator
Rv1360	oxidoreductase
Rv1361c	PPE family protein PPE19
Rv1362c	membrane protein
Rv1363c	membrane protein
Rv1364c	sigma factor regulatory protein
Rv1365c	anti-sigma-F factor antagonist RsfA
Rv1366	hypothetical protein
Rv1366A	hypothetical protein
Rv1367c	hypothetical protein
Rv1368	lipoprotein LprF
Rv1371	membrane protein
Rv1372	alpha-pyrone synthesis polyketide synthase-like protein
Rv1373	glycolipid sulfotransferase
Rv1374c	hypothetical protein
Rv1375	hypothetical protein
Rv1376	hypothetical protein
Rv1377c	transferase
Rv1378c	hypothetical protein
ROD-6	Common in slow growing species
Locus Tag	Product
Rv1497	esterase LipL
Rv1498c	methyltransferase
Rv1498A	hypothetical protein
Rv1499	hypothetical protein
Rv1500	glycosyltransferase
Rv1501	hypothetical protein
Rv1502	hypothetical protein
Rv1505c	hypothetical protein
Rv1506c	hypothetical protein
Rv1507c	hypothetical protein
Rv1507A	hypothetical protein
Rv1508c	membrane protein
Rv1508A	hypothetical protein
Rv1509	hypothetical protein
Rv1510	hypothetical protein
Rv1511	GDP-D-mannose dehydratase GmdA
Rv1512	nucleotide-sugar epimerase EpiA
Rv1513	hypothetical protein
Rv1514c	glycosyltransferase
Rv1515c	hypothetical protein
Rv1516c	sugar transferase
Rv1517	hypothetical protein
Rv1518	hypothetical protein
Rv1519	hypothetical protein
Rv1520	sugar transferase
ROD-7	Sporadic appearance in rapid and slow growing species
Locus Tag	Product
Rv1571	hypothetical protein
Rv1573	phage protein
Rv1574	phage protein
Rv1575	phage protein
Rv1576c	phage capsid protein
Rv1577c	phage prohead protease
Rv1578c	phage protein
Rv1579c	phage protein
Rv1580c	phage protein
Rv1581c	phage protein
Rv1582c	phage protein
Rv1583c	phage protein
Rv1584c	phage protein
Rv1585c	phage protein
Rv1586c	phage integrase
Rv1587c	hypothetical protein
Rv1588c	hypothetical protein
ROD-8	Present in M. tuberculosis complex
Locus Tag	Product
Rv1946c	lipoprotein
Rv1947	hypothetical protein
Rv1948c	hypothetical protein
Rv1950c	hypothetical protein
Rv1951c	hypothetical protein
Rv1952	antitoxin VapB14
Rv1953	ribonuclease VapC14
Rv1954c	hypothetical protein
Rv1955	toxin HigB
Rv1956	antitoxin HigA
Rv1957	SecB-like chaperone
Rv1958c	hypothetical protein
Rv1959c	toxin ParE1
Rv1960c	antitoxin ParD1
Rv1961	hypothetical protein
Rv1962c	ribonuclease VapC35
Rv1962A	antitoxin VapB35
Rv1963c	transcriptional repressor Mce3R
ROD-9	Present in M. tuberculosis complex
Locus Tag	Product
Rv2336	hypothetical protein
Rv2337c	hypothetical protein
Rv2338c	molybdopterin biosynthesis protein MoeW
Rv2339	transmembrane transport protein MmpL9
ROD-10	Common in slow growing species
Locus Tag	Product
Rv2345	transmembrane protein
Rv2346c	ESAT-6 like protein EsxO
Rv2347c	ESAT-6 like protein EsxP
Rv2348c	hypothetical protein
Rv2349c	phospholipase C
Rv2350c	membrane-associated phospholipase B
Rv2351c	membrane-associated phospholipase A
Rv2352c	PPE family protein PPE38
Rv2353c	PPE family protein PPE39
ROD-11	Present in M. tuberculosis complex
Locus Tag	Product
Rv2796c	lipoprotein LppV
Rv2797c	hypothetical protein
Rv2798c	hypothetical protein
Rv2799	membrane protein
Rv2800	hydrolase
Rv2801c	mRNA interferase MazF9
Rv2801A	antitoxin MazE9
Rv2802c	arginine/hypothetical protein
Rv2803	hypothetical protein
Rv2804c	hypothetical protein
Rv2805	hypothetical protein
Rv2806	membrane protein
Rv2807	hypothetical protein
Rv2808	hypothetical protein
Rv2809	hypothetical protein
Rv2811	hypothetical protein
Rv2812	transposase
Rv2813	hypothetical protein
Rv2816c	CRISPR-associated endoribonuclease Cas2
Rv2817c	CRISPR-associated endonuclease Cas1
Rv2818c	CRISPR-associated protein Csm6
Rv2819c	CRISPR type III-associated RAMP protein Csm5
Rv2820c	CRISPR type III-associated RAMP protein Csm4
Rv2821c	CRISPR type III-associated RAMP protein Csm3
Rv2822c	CRISPR type III-associated protein Csm2
Rv2823c	CRISPR-associated protein Cas10/Csm1
Rv2824c	CRISPR-associated endoribonuclease Cas6
Rv2825c	hypothetical protein
Rv2826c	hypothetical protein
Rv2827c	hypothetical protein
Rv2828c	hypothetical protein
Rv2828A	hypothetical protein
Rv2829c	ribonuclease VapC22
Rv2830c	antitoxin VapB22
Rv2831	enoyl-CoA hydratase EchA16
Rv2832c	sn-glycerol-3-phosphate ABC transporter ATP-binding protein UgpC
Rv2833c	sn-glycerol-3-phosphate ABC transporter substrate-binding lipoprotein UgpB
Rv2834c	sn-glycerol-3-phosphate ABC transporter permease UgpE
Rv2835c	sn-glycerol-3-phosphate ABC transporter permease UgpA
ROD-12	Sporadic appearance in rapid and slow growing species
Locus Tag	Product
Rv2955c	hypothetical protein
Rv2956	hypothetical protein
Rv2957	PGL/p-HBAD biosynthesis glycosyltransferase
Rv2958c	PGL/p-HBAD biosynthesis glycosyltransferase
Rv2959c	rhamnosyl O-methyltransferase
Rv2960c	hypothetical protein
Rv2961	transposase
Rv2962c	PGL/p-HBAD biosynthesis rhamnosyltransferase
Rv2963	integral membrane protein
Rv2964	formyltetrahydrofolate deformylase
Rv2965c	phosphopantetheine adenylyltransferase
Rv2966c	methyltransferase
ROD-13	Present in M. tuberculosis complex
Locus Tag	Product
Rv3424c	hypothetical protein
Rv3425	PPE family protein PPE57
Rv3426	PPE family protein PPE58
Rv3427c	transposase
Rv3428c	transposase
Rv3429	PPE family protein PPE59
Rv3430c	transposase
Rv3430a	hypothetical protein
ROD-14	Present in M. tuberculosis complex
Locus Tag	Product
Rv3723	transmembrane protein
Rv3725	oxidoreductase
Rv3726	dehydrogenase
Rv3727	oxidoreductase
Rv3728	membrane protein
Rv3729	transferase
Rv3730c	hypothetical protein
Rv3731	DNA ligase C
Rv3732	hypothetical protein
Rv3733c	hypothetical protein
Rv3734c	diacyglycerol O-acyltransferase
Rv3735	hypothetical protein
Rv3736	AraC/XylS family transcriptional regulator
Rv3737	transmembrane protein
Rv3738c	PPE family protein PPE66
Rv3739c	PPE family protein PPE67
Rv3740c	diacyglycerol O-acyltransferase
Rv3741c	oxidoreductase
Rv3742c	oxidoreductase
Rv3743c	cation transporter ATPase J
Rv3744	HTH-type transcriptional regulator NmtR
Rv3745c	hypothetical protein
Rv3746c	PE family protein PE34
Rv3747	hypothetical protein
Rv3748	hypothetical protein
Rv3749c	hypothetical protein
Rv3750c	excisionase
